# Supplementary material for: Tree migration in the dynamic, global vegetation model LPJ-GM 1.1: efficient uncertainty assessment and improved dispersal kernels of European trees
Source: Copernicus journal article supplement (doi:10.5194/gmd-15-4913-2022), 2022-06-27
Supplement: Supplementary file 1 [file gmd-15-4913-2022-supplement.zip]

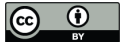

## *Supplement of*

# **Tree migration in the dynamic, global vegetation model LPJ-GM 1.1: efficient uncertainty assessment and improved dispersal kernels of European trees**

**Deborah Zani et al.**

*Correspondence to:* Deborah Zani ([deborah.zani01@gmail.com](mailto:deborah.zani01@gmail.com))

- [gmd-15-4913-2022-supplement-title-page.pdf](#)
- [supplement\\_REVISED](#)
  - [Figure\\_A1.png](#)
  - [Input\\_EVA.csv](#)
  - [Input\\_KA.csv](#)
  - [Input\\_SA.csv](#)
  - [Input\\_SA\\_model2.csv](#)
  - [Supplement\\_Figures.pdf](#)
  - [Supplement\\_Information.ipynb](#)
  - [Supplement\\_Information.pdf](#)
  - [Table\\_B1.csv](#)
  - [Table\\_B2.csv](#)
  - [Table\\_B3.csv](#)
  - [Table\\_S1.csv](#)
  - [Table\\_S2.csv](#)
  - [Table\\_S3.csv](#)
  - [environment.yml](#)
  - [how\\_to\\_run\\_SI\\_ipynb.txt](#)
  - [post\\_processing](#)
    - \* [Postprocessing\\_plotMigrationRate.m](#)
    - \* [downscale.m](#)
    - \* [lai.out](#)
    - \* [readme.txt](#)

The copyright of individual parts of the supplement might differ from the article licence.
